# Supplementary material for: The ferroptosis landscape in acute myeloid leukemia
Source: publisher site journal article supplement (doi:10.18632/aging.205257), 2023-11-29
Supplement: Supplementary file [file aging-v15i22-205257-supplementary-material-SD1.pdf]

## SUPPLEMENTARY FIGURES

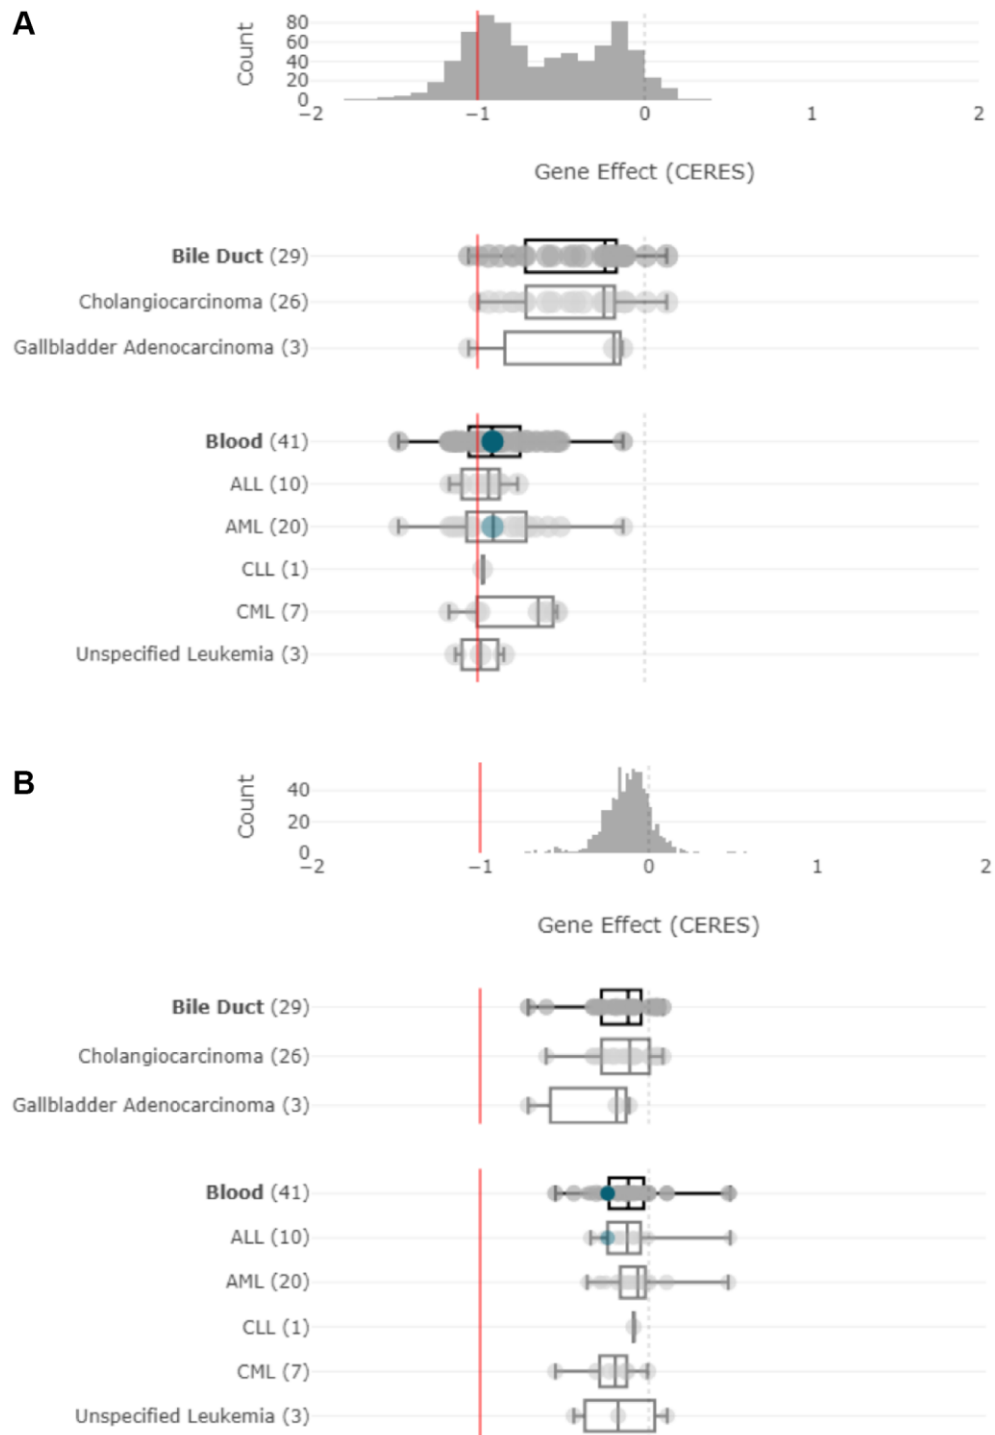

**Supplementary Figure 1.** The dependency of leukemia cells on GPX4 (A) and AIFM2 (B), figures are obtained from Depmap and screenshotted.

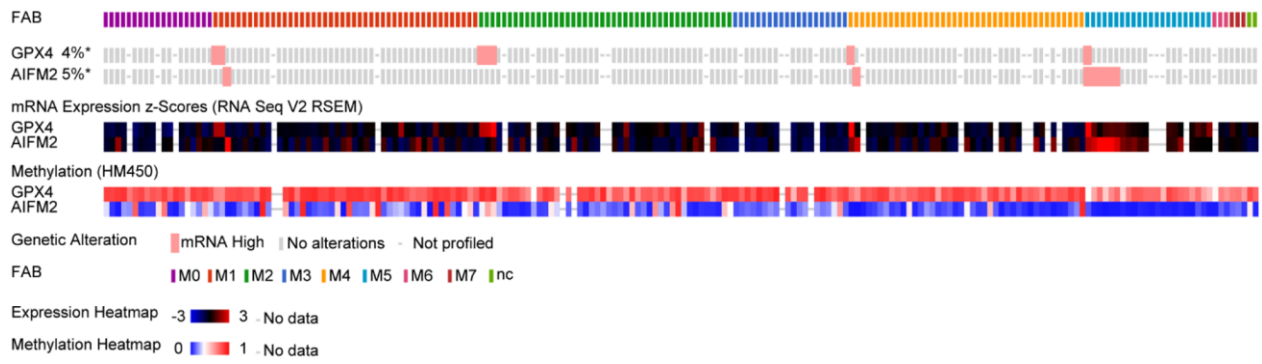

Supplementary Figure 2. Expression of GPX4 and AIFM2 in AML patients and the methylation profile of promoters in AML FAB subtype.

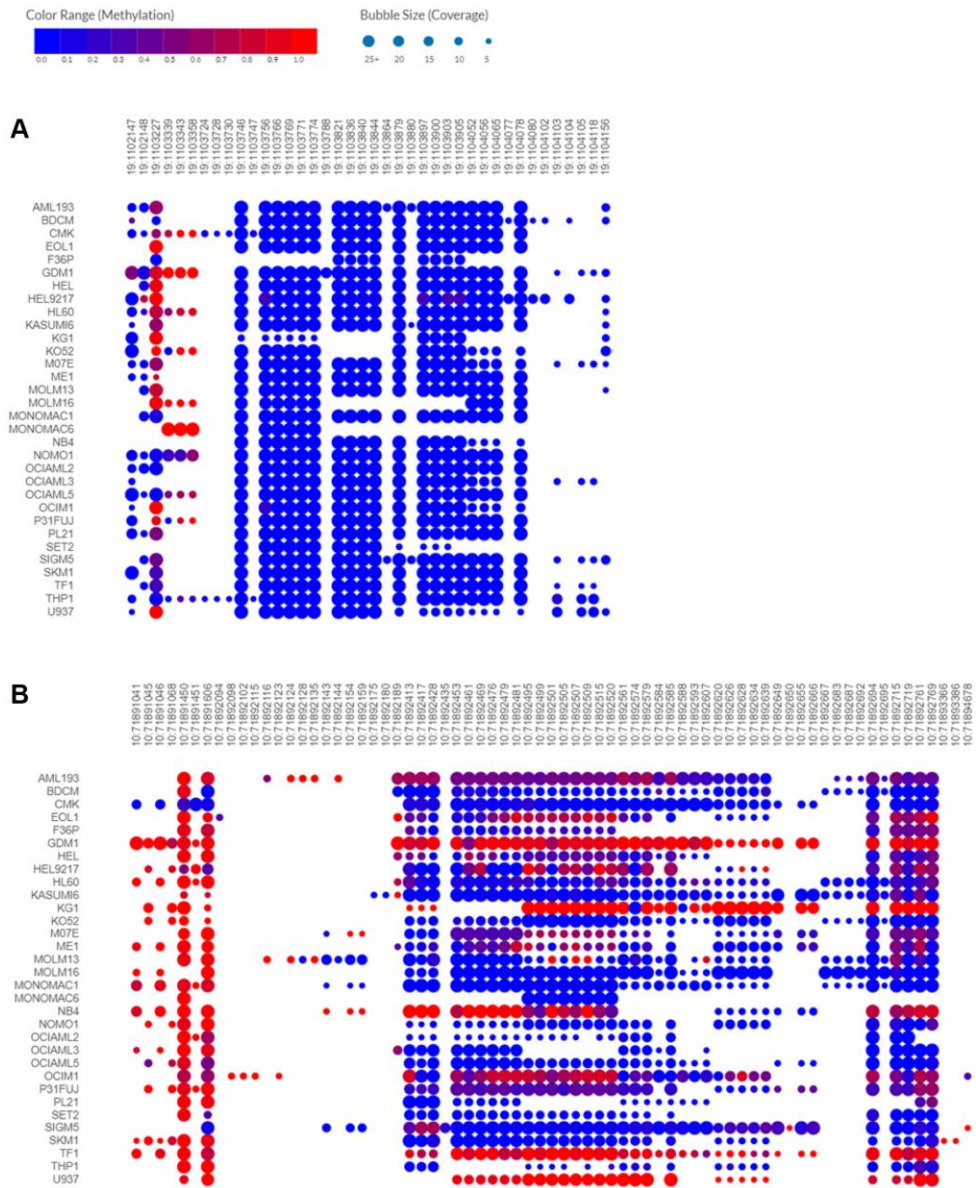

Supplementary Figure 3. CpG island methylation of GPX4 (A) and AIFM2 (B) promoters, figures are obtained from Depmap.
